# Supplementary material for: Representation of seasonal land-use dynamics in SWAT+ for improved assessment of blue and green water consumption
Source: Copernicus journal article supplement (doi:10.5194/hess-2021-171), 2021-05-11
Supplement: Supplementary file [file hess-2021-171-AC7-supplement.pdf]

### **Reply to Referee 3**

**Overview:** We would like to thank the reviewer for his/her dedication in reviewing the manuscript. We are also thankful for his/ her consideration and constructive suggestions and comments that have improve the revised manuscript.

Note: The lines are mentioned following simple makeup

**Reviewer summary:** The paper “Representation of seasonal land-use dynamics in SWAT+ for improved assessment of blue and green water consumption” reports an application of the SWAT+ model in Africa. The authors implemented seasonal dynamic land-use in SWAT+ in order to improve vegetation growth simulation and to obtain more realistic temporal patterns of the blue and green water consumption from simulated evapotranspiration. Results of the simulations (static and dynamic seasonal land use) in terms of ET were compared to the ET values estimated by using remote sensing. The authors concluded that the seasonal land-use dynamic approach produces better ET results, which provides better estimations of blue and green water.

General comments:

**Reviewer comment:** The paper is very similar to a previous work that has been published in 2020 by the same research group (Nkwasa et al., 2020). The latter paper showed a better performance of the SWAT+ model by using the seasonal land use dynamic (ET at HRU level after the implementation of trajectories in SWAT+ model was compared to the default SWAT+ model). In addition, in 2019 the authors published a study carried out in the same basin applying SWAT+ with dynamic land use and the authors concluded that detailed seasonal land use maps are essential for quantifying annual irrigation water use of catchment areas. For these reasons, it seems difficult to find the novelty of the present paper. Hence, I invite the author to revise the introduction in order to better focus on the advancement of knowledge proposed in this study. Taking into account that the methodological approach (seasonal land-use dynamics in SWAT+) has already been published, the authors should better focus on the green and blue waters.

I suggest major revisions, the current version cannot be published in HESS.

**Authors Response:** The introduction and subsequent sections of the manuscript have been revised to focus more on the blue and green water.

To make a clear distinction with earlier studies, we have first introduced blue and green water with definitions, and their relevance. However, mapping the blue and green water is possible with agro-hydrological models such as SWAT+ but then they need a better representation of the seasonality/cropping seasons. Hence, this can be done by the trajectory approach in SWAT+ as suggested by Nkwasa et al. (2020). The innovation is that we use an agro-hydrological model (SWAT+) to evaluate blue and green water by implementing the seasonal land-use dynamic. Additionally, we use remote sensing ET for evaluation of the simulated model ET.

Methodology:

**Reviewer comment:** a better description of the remote sensing ET evaluation is needed, the reference IHE Delft, 2020 is not listed.

**Authors Response:** The reviewer comment is well taken. We added details on the remote sensing ET (line 228-235) and also included the 'IHE Delft; 2020' in the reference list.

**Reviewer comment:** More details on irrigation are needed, for instance, the source of water for irrigation (i.e. from the river, shallow aquifer, etc). Analyzing table 1, it seems that the option auto-irrigation was used. Please explain it. Did the author compare the amount of auto-irrigation to the actual irrigation (data provided by farmers)?

**Authors Response:** In the revised manuscript, we included the details of irrigation such as the source of water (river) (line 200-202). We failed to evaluate the auto-irrigation in comparison with the actual irrigation through the information gathered in the field, we have limited data of measured water applied in the field.

**Reviewer comment:** In my opinion, the equations and description of the RMSE, PBIAS, and NSE are not necessary.

**Authors Response:** We agree with the reviewer comment. We have deleted the description of the RMSE, PBIAS and NSE in the revised manuscript.

**Reviewer comment:** For which period was the model run?

**Authors Response:** The model run from a period of 2006 to 2013. The years 2006 and 2007 were used as a warming period.

**Reviewer comment:** Figure 2 has already been reported in Msigwa et al., 2019 and for this reason, I suggest do not report it here.

**Authors Response:** We agree with the comment. However, we have revised the figure and added new information of temperature. According to reviewer 2 comments.

**Reviewer comment:** I suggest adding a new map in figure 3 with the land use (static land use).

**Authors Response:** The comment is well taken. We have added information on both the trajectory and static land use maps.

**Reviewer comment:** Calibration needs a better presentation. It seems that the calibration was performed for the static and dynamic approach, please show the calibrated parameters in both simulations. A table with calibrated parameters for both simulations is expected. What about validation?

**Authors Response:** We did not calibrate the SWAT+ model, our aim was mainly to improve the spatial distribution of blue and green water consumption and not discharge simulation. We evaluated the simulated ET by comparing with the remote sensing ET. A detailed explanation has been added in section 2.7.

Result section:

**Reviewer comment:** Methods reported in Lines from 324 to 335 are not reported in the “Material and methods” section. What is the aim to show them in Figure 8? In my opinion, this section should be eliminated.

**Authors Response:** The comment is well taken. We have added a brief explanation of the methods for estimating blue and green ET that we have compared with the SWAT+ model results. The section 2.9 is added.

The aim of comparing blue and green ET estimates was to provide evidence that the blue ET estimates from dynamic SWAT+ model show no statistical difference with the blue ET estimated using remote sensing with Van Eekelen method.

**Reviewer comment:** Line 335. Caption Figure 8. Msigwa et al. 2020 is not reported in the references. Is this reference the same as that reported in Line 355 Msigwa et al. 2021 (missed in the reference)?

**Authors Response:** Thank you for the comment we have included the references in the reference section of the revised manuscript.

Discussions:

**Reviewer comment:** Innovative aspects of your research should be highlighted and presented against the state-of-the-art. The authors reported (LINE 355) that blue and green ET estimates from SWAT+ for the mixed crop land-use show no significant difference in the values from the two methods (EK and SWB) assessed in the upcoming paper by Msigwa et al., (2021). This is not the aim of the present paper.

**Authors Response:** The paper now focuses on the blue and green ET, hence it is relevant for comparison of blue ET from other method.

**Reviewer comment:** Please discuss the difference between Figure 5b and fig. 5c and their comparison with figure 7. I did not understand why static and dynamic ET do not match for static land use areas. In the upper right corner, figure5b shows the green areas in correspondence with the static land use (see fig 3). The large difference is difficult to explain with a different number of HRUs. In addition, a large difference remains between dynamic and satellite ET (Fig 5a and 5b) that needs to be explained.

**Authors Response:** We agree with the reviewer comment that the ET for static land uses needs to be same. We have reviewed the model setups and rectified our simulations.

The number of HRUs will be different because the input land use maps have different number of land uses classes. Dynamic model the land use map (trajectory map) had 40 land use classes while the static land use map had 14 land use classes. However, the same number of subbasins is maintained to try and preserve a similar model structure.

The ET from the dynamic model setup could not reach maximum satellite ET because the satellite ET estimates also have uncertainties in the mountainous areas due to the presence of cloud cover. There are no observation data in these areas that we can validate with. We also used the rainfall ground stations for ET simulation while the remote sensing use the energy balance models. This explanation is added in the discussion section (Line 375-377)

**Reviewer comment:** Please discuss differences in water balance components between static and dynamic scenarios.

**Authors Response:** The reviewer's comment is well taken. Explanation of differences in water balance components between static and dynamic has been included in the revised manuscript line 177-178.

**Reviewer comment:** Please discuss the limit of the present study.

**Authors Response** We have discussed the limitation of our study. (Line 385-394)

**Reviewer comment:** Conclusions need to be improved.

**Authors Response:** We agree with the reviewer's comment. We have revised and improved the conclusion section.

**Reviewer comment:** The authors reported, "The maps with calculated blue water use from the dynamic SWAT+ model correspond to the known irrigated area and the calculated blue water amount is in line with previous studies". The first assertion is obvious since the authors set the irrigation in that areas. The second was expected since the authors refer to their previous papers.

**Authors Response:** We have rephrased the sentence.

**Reviewer comment:** The paper needs to be carefully checked for typing errors (see some of them have been highlighted in the file enclosed)

**Authors Response:** We have implemented all the corrections and checked for other typing errors in the revised manuscript.
